# Supplementary material for: Nuclear Organization during Hepatogenesis in Zebrafish Requires Uhrf1
Source: Genes (Basel). 2021 Jul 16;12(7):1081. doi: 10.3390/genes12071081 (PMC8304062; doi:10.3390/genes12071081)
Supplement: Supplementary file 1 [file genes-12-01081-s001.zip]

Archive with 4 entries (4 files):
- SUPPLEMENTARY FILES.pdf
- Table S1.xlsx
- Table S2.xlsx
- Table S3.xlsx
