# Supplementary material for: Nuclear Organization during Hepatogenesis in Zebrafish Requires Uhrf1
Source: Genes (Basel). 2021 Jul 16;12(7):1081. doi: 10.3390/genes12071081 (PMC8304062; doi:10.3390/genes12071081)
Supplement: Supplementary file 1 [file genes-12-01081-s001.zip › Table S1.xlsx]

## Sheet: Sheet1
Primer Name	NCBI official symbol	NCBI Reference Sequence #	Sequence 5'-3'	Application	Target Species	Information/ comments
zf_exoc4Fq1	exoc4	NM_001030134.2	CTGGATTTCGCCAGGCAGTA	qPCR	ZF	Exon junction								2669/2670 (forward primer) on template NM_001030134.2
zf_exoc4Rq1	exoc4	NM_001030134.2	CTCTGTGTAACGCACCCCTT	qPCR	ZF	Exon junction								2669/2670 (forward primer) on template NM_001030134.2
zf_dennd5bFq1	dennd5b	NM_212644.1	TGAATAACGGACGCGGACAA	qPCR	ZF	Exon junction								274/275 (reverse primer) on template NM_212644.1
zf_dennd5bRq1	dennd5b	NM_212644.1	AGCCACTGGTATAAAGCTGCC	qPCR	ZF	Exon junction								274/275 (reverse primer) on template NM_212644.1
zf_rpl3Fq1	rpl3	NM_001001590.1	AGCTTGAGCAGTCCATTCCC	qPCR	ZF	Exon junction								769/770 (reverse primer) on template NM_001001590.1
zf_rpl3Rq1	rpl3	NM_001001590.1	CAACGGCTAGTCACACCCTT	qPCR	ZF	Exon junction								769/770 (reverse primer) on template NM_001001590.1
zf_rpl23aFq1	rpl23a	NM_001001593.2	TCCACGCAGAAACAAGTTGG	qPCR	ZF	Exon junction								229/230 (forward primer) on template NM_001001593.2
zf_rpl23aRq1	rpl23a	NM_001001593.2	ACGGTTTCTTGACGGCATGT	qPCR	ZF	Exon junction								229/230 (forward primer) on template NM_001001593.2
zf_rpf1Fq1	rpf1	NM_001002160.2	GACCGAAAAGTGCCAAATGGT	qPCR	ZF	Exon junction								687/688 (forward primer) on template NM_001002160.2
zf_rpf1Rq1	rpf1	NM_001002160.2	GAGACGGCCAATGGAGTGAC	qPCR	ZF	Exon junction								687/688 (forward primer) on template NM_001002160.2
zf_phf6Fq1	phf6	NM_199765.1	GAGAGGAGGAAGAGCGAGAACA	qPCR	ZF	Exon junction								482/483 (reverse primer) on template NM_199765.1
zf_phf6Rq1	phf6	NM_199765.1	TGTTTGCGACAGTAAACAAGATAGA	qPCR	ZF	Exon junction								482/483 (reverse primer) on template NM_199765.1
zf_hmgb3b_Fq1	hmgb3b		GTCTTTGTGTCAAGGCTGCTATACA	qPCR	ZF	Reference: https://doi.org/10.1016/j.gep.2010.08.006
zf_hmgb3b_Rq1	hmgb3b		TCACCATTGAGAGAGGTTGTCTGA	qPCR	ZF	Reference: https://doi.org/10.1016/j.gep.2010.08.006
zf_rplp0_Fq1	rplpo		ctgaacatctcgcccttctc	qPCR	ZF	Exon junction
zf_rplp0_Rq1	rplpo		tagccgatctgcagacacac	qPCR	ZF	Exon junction
