# Supplementary material for: Nuclear Organization during Hepatogenesis in Zebrafish Requires Uhrf1
Source: Genes (Basel). 2021 Jul 16;12(7):1081. doi: 10.3390/genes12071081 (PMC8304062; doi:10.3390/genes12071081)
Supplement: Supplementary file 1 [file genes-12-01081-s001.zip › Table S2.xlsx]

## Sheet: Sheet1
Table S2: Sequencing data set summary for 120 hpf zebrafish livers.
Sample Name	Reads	Align Rate	Library Prep	Called Peaks	GEO Accession
5dpf_Liver_ATAC_S1	12921844	0.9855	PE	1741	GSM5278621
5dpf_Liver_ATAC_S2	12820200	0.9865	PE	2018	GSM5278622
5dpf_Liver_ATAC_S3	21063404	0.9645	PE	6510	GSM5278623
Sample Name	Reads	Align Rate	Library Prep	CpG10	GEO Accession
RRBS_WT_5dpf_Livers_1	26323874	0.285	PE	1737214	GSM5278624
RRBS_WT_5dpf_Livers_2	24931603	0.237	PE	1580592	GSM5278625
RRBS_WT_5dpf_Livers_3	24820006	0.183	PE	1105012	GSM5278626
