# Supplementary material for: Nuclear Organization during Hepatogenesis in Zebrafish Requires Uhrf1
Source: Genes (Basel). 2021 Jul 16;12(7):1081. doi: 10.3390/genes12071081 (PMC8304062; doi:10.3390/genes12071081)
Supplement: Supplementary file 1 [file genes-12-01081-s001.zip › Table S3.xlsx]

## Sheet: Sheet1
	n. genes
All genes	32105
All genes with read count > 0 in at least 1 sample	25455
All genes significantly changed (padj < 0.05)	5960
All genes NOT significantly changed (padj >= 0.05)	19489
Genes significally Upregulated (padj < 0.05 & log2FoldChange > 1.5)	1837	Corresponding human gene names used for GO
Genes significally Downregulated (padj < 0.05 & log2FoldChange < - 1.5)	2017	Corresponding human gene names used for GO
Genes not significantly changed (padj> 0.05 & log2FoldChange > -1.5 & log2FoldChange < 1.5 )	14750	Corresponding human gene names used for GO
